# Supplementary material
Source: PubMed Central journal article supplement (PMC9114243)
Supplement: 40123_2022_509_MOESM1_ESM.pdf [file 40123_2022_509_MOESM1_ESM.pdf]

# Title: Use of Imaging Technology to Assess the Effect of COVID-19 on Retinal Tissues: A Systematic Review

First author and corresponding Author: Orlaith E McGrath, orlaith.mcgrath@mft.nhs.uk

Affiliations:    1. The University of Manchester, Manchester, UK.  
                  2. Manchester Royal Eye Hospital, NHS Central Manchester University Hospitals, Manchester, UK.

Last Author: Tariq M Aslam

Affiliations:    1. School of Pharmacy and Optometry, Faculty of Biology, Medicine and Health, The University of Manchester, Manchester, UK.  
                  2. Manchester Royal Eye Hospital, NHS Central Manchester University Hospitals, Manchester, UK.

| Study                | Funding                                                                                        | Study Type   | Time post covid                  | Cohort size (Cases, Controls) | Covid Severity           | Study group OCT findings                                       | Study group OCTA findings                                                                    | Study Group Fundus Photography/ Fundus Autofluorescence findings |
|----------------------|------------------------------------------------------------------------------------------------|--------------|----------------------------------|-------------------------------|--------------------------|----------------------------------------------------------------|----------------------------------------------------------------------------------------------|------------------------------------------------------------------|
| Abrishami et al.     | Financial support of the Vice-Chancellor of Research of Mashhad University of Medical Sciences | Case-Control | At least 14 days from symptoms   | 31, 23                        | Mild (71%), Severe (29%) |                                                                | Reduced mean SCP VD and DCP VD; decreased blood flow in the SCP and DCP.                     |                                                                  |
| Beni et al.          | Nil                                                                                            | Case-Control | 40-95 days post symptom onset    | 51,37                         | Moderate                 |                                                                | Moderate-intensity SARS-CoV-2 pneumonia had altered peripapillary and macular vessel density | x                                                                |
| Burgos-Blasco et al. | Nil                                                                                            | Case-Control | 38.8 days ± 13.3                 | 29,61                         | Mild                     | Increase in peripapillary RNFL thickness (global and sectoral) | x                                                                                            | Nil of note                                                      |
| Cennamo et al.       | Nil                                                                                            | Case-Control | 6 months post hospital discharge | 40,40                         | Moderate                 |                                                                | Significant reduction in SCP and DCP VD and Radial                                           |                                                                  |

|                              |                                                                                                                                                                                                                                                                     |                  |                                       |       |                                        |                   |                                                                                                                                                                                                                                                                      |
|------------------------------|---------------------------------------------------------------------------------------------------------------------------------------------------------------------------------------------------------------------------------------------------------------------|------------------|---------------------------------------|-------|----------------------------------------|-------------------|----------------------------------------------------------------------------------------------------------------------------------------------------------------------------------------------------------------------------------------------------------------------|
| Banderas<br>García et<br>al. | Nil                                                                                                                                                                                                                                                                 | Case-<br>Control | 8.5 months                            | 56,19 | Mild (18) moderate<br>(21) severe (17) |                   | Peripapillary<br>Capillary<br>plexus (RPC)<br>in all sectors;<br>more<br>significant<br>impairment<br>of the DCP<br>than the SCP<br>Persistent<br>reduction in<br>the central<br>vascular area<br>over time in<br>patients with<br>moderate<br>and severe<br>disease |
| Gonzalez<br>Zamora<br>et al. | Research grants<br>from the "Instituto<br>de Salud Carlos<br>III/European<br>Regional<br>Development Fund<br>(ERDF)" and<br>RD16/0008/0011,<br>OFTARED:<br>Enfermedades<br>oculares:<br>"Prevención,<br>detección precoz,<br>tratamiento y<br>rehabilitación de las | Case-<br>Control | 14 days post<br>hospital<br>discharge | 25,25 | Mod to severe                          | VCIPL<br>thinning | Thinner<br>ganglion cell<br>layer and<br>thicker retinal<br>nerve fibre<br>layer                                                                                                                                                                                     |

|                        | patologías oculares”.                                                                                                 |              |                                 |        |                                      |                                              |                                                                                     |                                                                                            |
|------------------------|-----------------------------------------------------------------------------------------------------------------------|--------------|---------------------------------|--------|--------------------------------------|----------------------------------------------|-------------------------------------------------------------------------------------|--------------------------------------------------------------------------------------------|
| Guemes Villahoz et al. | Nil                                                                                                                   | Case-Control | 88 days post diagnosis          | 66,29  | Intrathrombotic, no thrombotic event |                                              | Lower VD and perfusion density compared to healthy controls                         |                                                                                            |
| Hazar et al.           | Financial Support: National Medical Research Council Singapore Open Fund Large Collaborative Grant: NMRC/LCG/004/2018 | Case-Control | 1 month post-hospital discharge | 50,55  | Mild to moderate                     |                                              | VD is low in some sectors in both superficial and deep layers, but no change in FAZ |                                                                                            |
| Invernizzi et al.      | Nil                                                                                                                   | Case-Control | 30 days from symptom onset      | 54,133 | Mild (74%), severe (26%)             |                                              |                                                                                     | Dilated fundus veins (27.7%), CWS (7.4%), retinal haemorrhages (9.25%), Higher MAD and MVD |
| Oren et al.            | Nil                                                                                                                   | Case-Control | 14 to 30 days post symptoms     | 35,25  | Mild                                 | Increased CMT, reduced GCL and INL thickness | x                                                                                   |                                                                                            |
| Savastano et al.       | Nil                                                                                                                   | Case-Control | 36.1 days post discharge        | 70,22  | Moderate to severe                   |                                              | Reduced perfusion density and a reduced                                             |                                                                                            |

|                  |     |              |                                                     |        |                                     |                                         |                                                                                                                        |                                                                   |
|------------------|-----|--------------|-----------------------------------------------------|--------|-------------------------------------|-----------------------------------------|------------------------------------------------------------------------------------------------------------------------|-------------------------------------------------------------------|
| Szkodny et al.   | Nil | Case-Control | 1-4 months post diagnosis                           | 156,98 | Mild to severe                      | Nil significant found                   | perfusion flow index of the RPC<br>Nil significant found                                                               |                                                                   |
| Turker et al.    | Nil | Case-Control | Within 1 week post hospital discharge               | 27,27  | Moderate                            |                                         | VD was considerably lower and significantly higher choriocapillary is flow area values<br>The decreased central retina |                                                                   |
| Zapata et al.    | Nil | Case-Control | 36 days post hospital discharge, 60d post diagnosis | 96,27  | Mild (24) moderate (24) severe (21) |                                         | VD was related to COVID-19 infection severity                                                                          |                                                                   |
| Brantl et al.    | Nil | Case Series  | 3 months                                            | 21     | Mild to Moderate                    | Nil of note after 3 months of follow up | Nil of note after 3 months of follow up                                                                                |                                                                   |
| Bypareddy et al. | Nil | Case Series  | 6 days                                              | 138    | Mild to moderate(hospitalised)      |                                         |                                                                                                                        | Nil of note found on examination (1 patient had a retinal streak) |

|                     |                                                                                                                                         |             |                                   |    |                                                                            |                                                                                                                                                                                                                           |
|---------------------|-----------------------------------------------------------------------------------------------------------------------------------------|-------------|-----------------------------------|----|----------------------------------------------------------------------------|---------------------------------------------------------------------------------------------------------------------------------------------------------------------------------------------------------------------------|
| Costa et al.        | Scholarship from the "Conselho Nacional de Desenvolvimento Científico e Tecnológico" (CNPq) for working with COVID-19 research projects | Case Series | 82±36.4 days post symptom onset   | 64 | Mild to moderate (n = 7), severe (n = 33), critical (n = 24)(hospitalised) | haemorrhage, likely incidental)<br>N=2 showed discrete white-yellowish dots in the posterior pole, leading to hypo-reflective changes at the RPE level, outer segment, and ellipsoid layers.                              |
| Landecho et al.     | Nil                                                                                                                                     | Case Series | 14 days post-hospital discharge   | 27 | Moderate Severe, post-hospital discharge                                   | cotton wool spots in six of 27 eyes (22%)                                                                                                                                                                                 |
| Lani Louzada et al. | Nil                                                                                                                                     | Case Series | 2 to 14 days post symptom onset   | 25 | Moderate Severe, (hospitalised)                                            | microhemorrhages, flame-shaped haemorrhage and nerve fibre layer infarcts<br>Hyper-autofluorescence findings were present in 6 patients, Hypo-autofluorescence in 14 patients and six patients had mixed pattern lesions. |
| Marinho et al.      | Nil                                                                                                                                     | Case Series | Mean 44 days post covid diagnosis | 18 | Mild to severe                                                             |                                                                                                                                                                                                                           |

|                  |     |             |                                |     |                               |   |   |                                                                                                                                                  |
|------------------|-----|-------------|--------------------------------|-----|-------------------------------|---|---|--------------------------------------------------------------------------------------------------------------------------------------------------|
| Pereira et al.   | Nil | Case Series | 11.5 days                      | 18  | Severe (hospitalised)         |   |   | Flame hemorrhages (n = 4)<br>CWS (n = 4)<br>Flame hemorrhages and CWS (n = 1)<br>Peripheral hemorrhages (n = 2)<br>Acute retinal ischaemia (n=1) |
| Pirraglia et al. | Nil | Case Series | 21.5 days post hospitalisation | 46  | Mild to severe (hospitalised) | x | x | No sign of retinal involvement seen                                                                                                              |
| Sim et al.       | Nil | Case Series | 16 days post-diagnosis         | 108 | Mild (not hospitalised)       |   |   |                                                                                                                                                  |

| Study             | Study Type  | Age | Covid Severity | Ocular Symptoms      | Monocular? | OCT                                                                     | OCTA                             | Fundus Photography/Fundus autofluorescence | Fundus Exam    |
|-------------------|-------------|-----|----------------|----------------------|------------|-------------------------------------------------------------------------|----------------------------------|--------------------------------------------|----------------|
| Conrady et al.    | Case Report | 40  |                | Visual loss          | Monocular  | White-dot-like outer retinopathy                                        | White-dot-like outer retinopathy | white-dot-like outer retinopathy           |                |
| Dumitrascu et al. | Case Report | 48  | Severe         | Acute visual loss    | Monocular  |                                                                         |                                  |                                            | Incomplete OAO |
| Gascon et al.     | Case Report | 53  | Mild           | acute loss of vision | Monocular  | Acute macular neuroretinopathy and paracentral acute middle maculopathy |                                  |                                            |                |

|                          |             |    |        |                     |            |                                                                                       |                                                                      |                                                                              |      |
|--------------------------|-------------|----|--------|---------------------|------------|---------------------------------------------------------------------------------------|----------------------------------------------------------------------|------------------------------------------------------------------------------|------|
| Gonzalez-Lopez et al.    | Case Report | 50 | Mild   | Arcuate VF defect   | Monocular  |                                                                                       |                                                                      | SCP ischemia which corresponds to the arcuate scotoma observed on VF testing |      |
| Ortiz-Egea et al.        | Case Report | 42 | Mild   | Scotoma             |            | Hyperreflective, placoid band at the GCL and IPL                                      |                                                                      |                                                                              |      |
| Olguín-Manríquez et al.  | Case Report | 35 | Mild   | Visual loss         |            | acute posterior multifocal placoid pigment epitheliopathy<br>Inner retinal thinning   |                                                                      | Multiple yellow-white placoid lesions involving the fovea                    |      |
| Ortiz-Seller et al.      | Case Report | 51 | Mild   | Retro-orbital pain  | Binocular  | temporal to the fovea in both eyes, and focal disruptions of the outer retinal layers | Bilateral areas of nonperfusion at the level of the choriocapillaris | Weak hyper autofluorescence of lesions                                       |      |
| Virgo and Mohamed et al. | Case Report | 37 | Mild   | Paracentral scotoma |            | PAMM                                                                                  |                                                                      |                                                                              |      |
| Virgo and Mohamed et al. | Case Report | 32 | Mild   | Paracentral scotoma |            | AMN                                                                                   |                                                                      |                                                                              |      |
| Acharya et al.           | Case Report | 60 | Severe | Visual loss         | Monoocular | x                                                                                     | x                                                                    | x                                                                            | CRAO |



|              |             |    |                |           |                                               |   |            |            |
|--------------|-------------|----|----------------|-----------|-----------------------------------------------|---|------------|------------|
| Sheth et al. | Case Report | 52 | Reduced vision | Monocular | Serous macular detachment and significant CMO | x | BRVO, HRVO | BRVO, HRVO |
|--------------|-------------|----|----------------|-----------|-----------------------------------------------|---|------------|------------|

x not done

RNFL Retinal Nerve Fiber Layer

RPC radial peripapillary capillary

MAD Mean Artery Diameter

MVD Mean Vein Diameter

SCP Superficial Capillary Plexus

CMO cystoid macular oedema

FAZ Foveal Avascular Zone

VD Vessel Density

CWS Cotton Wool Spots

OAO Ophthalmic Artery Occlusion

CRAO Central Retinal Artery Occlusion

BRVO Branch Retinal Vein Occlusion

HRVO Hemiretinal Vein Occlusion

PAMM Paracentral Acute Middle Maculopathy

AMN Acute Macular Neuroretinopathy
